# Supplementary material for: An orange iridium(iii) complex with wide-bandwidth in electroluminescence for fabrication of high-quality white organic light-emitting diodes
Source: Royal Society of Chemistry journal article supplement (doi:10.1039/c3tc31365d), 2013-01-01
Supplement: c3tc31365d.pdf [file c3tc31365d.pdf]

## Electronic Supplementary Information (ESI)

# **Orange iridium(III) complex with wide-bandwidth in electroluminescence for high-quality white organic light-emitting diode**

Hongtao Cao,<sup>a,#</sup> Guogang Shan,<sup>a,#</sup> Xuemei Wen,<sup>b</sup> Haizhu Sun,<sup>\*a</sup> Zhongmin Su,<sup>\*a</sup>

Ronglin Zhong,<sup>a</sup> Wenfa Xie,<sup>\*b</sup> Peng Li<sup>a</sup> and Dongxia Zhu<sup>a</sup>

<sup>a</sup>College of Chemistry, Northeast Normal University, Changchun, Jilin, 130024, P. R.

China

<sup>b</sup>State Key Laboratory on Integrated Optoelectronics, College of Electronic Science and Engineering, Jilin University, Changchun, Jilin, 130012, P. R. China

**\*Corresponding author: Dr. Haizhu Sun; Prof. Zhongmin Su; Prof. Wenfa Xie**

**E-mail:** [sunhz335@nenu.edu.cn](mailto:sunhz335@nenu.edu.cn); [zmsu@nenu.edu.cn](mailto:zmsu@nenu.edu.cn); [xiewf@jlu.edu.cn](mailto:xiewf@jlu.edu.cn)

<sup>#</sup>These authors contributed equally to this work.

**Table S1** The calculated energy levels of the lower-lying transitions of complex **(pbi)<sub>2</sub>Ir(piq)**.

| States         | Assignment <sup>a</sup> | eV   | λ (nm) | f | Nature <sup>b</sup>                                   |
|----------------|-------------------------|------|--------|---|-------------------------------------------------------|
| T <sub>1</sub> | H→L (90%)               | 2.11 | 587    | 0 | <sup>3</sup> MLCT/ <sup>3</sup> LLCT/ <sup>3</sup> LC |
| T <sub>2</sub> | H-2→L (83%)             | 2.53 | 489    | 0 | <sup>3</sup> MLCT/ <sup>3</sup> LLCT/ <sup>3</sup> LC |
| T <sub>3</sub> | H-1→L (89%)             | 2.85 | 434    | 0 | <sup>3</sup> MLCT/ <sup>3</sup> LLCT/ <sup>3</sup> LC |

<sup>a</sup> H and L denote HOMO and LUMO, respectively. <sup>b</sup> MLCT, LLCT and LC denote metal-to-ligand charge transfer, ligand-to-ligand charge transfer and ligand centered, respectively.

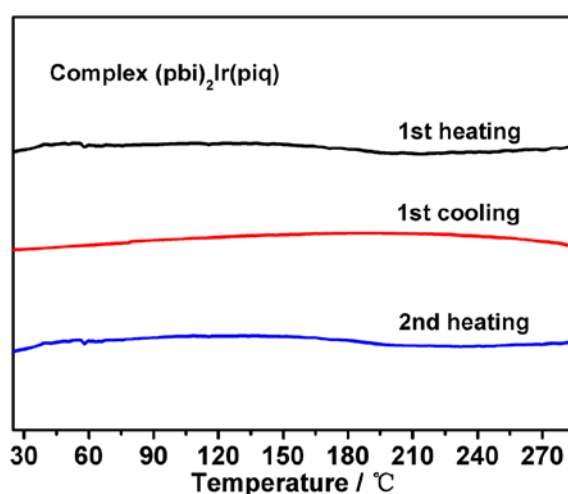

**Fig. S1** DSC curves of complex **(pbi)<sub>2</sub>Ir(piq)**. Heating and cooling rates are 10 °C min<sup>-1</sup> in a nitrogen atmosphere.

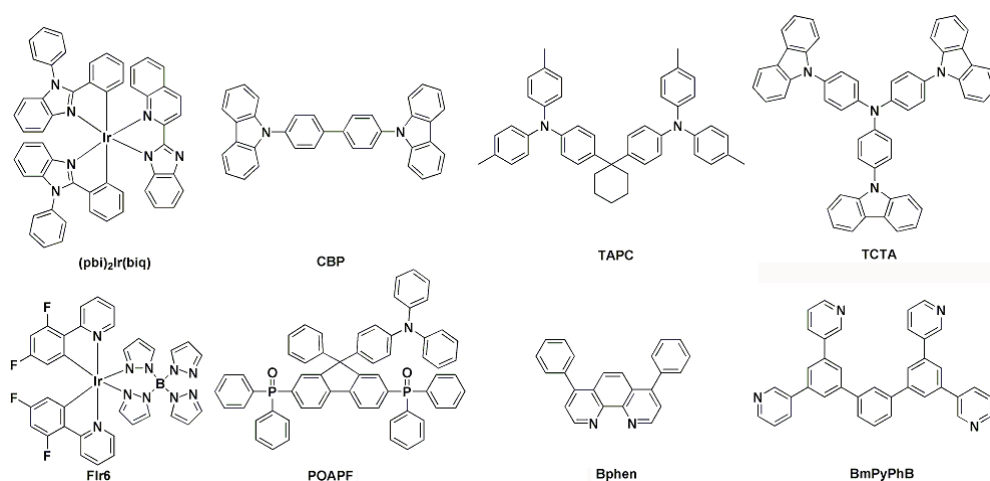

**Fig. S2** Chemical structures of the materials used in OLEDs.

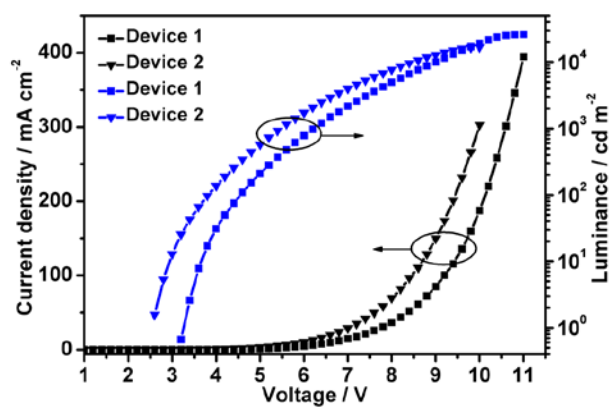

Fig. S3 Current density–voltage–luminance characteristics for orange devices **1** and **2**.

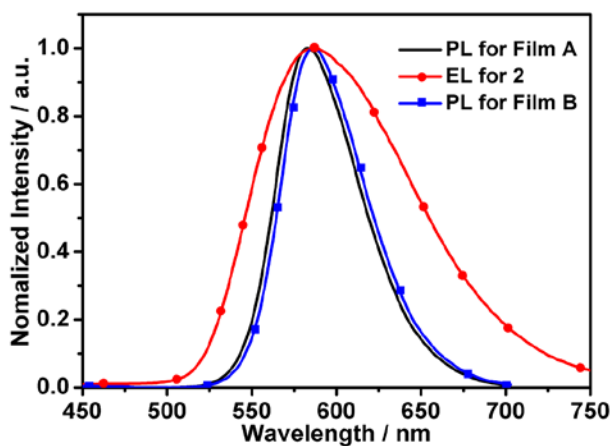

Fig. S4 PL spectra of  $(\text{pbi})_2\text{Ir}(\text{biq})$  in the spin-coated (**Film A**) and evaporated neat films (**Film B**) and EL spectrum for orange device **2**.
